# Supplementary material
Source: HighWire-hosted journal article supplement (https://lupus.bmj.com/content/6/1/e000324)
Supplement: inline-supplementary-material-1 [file inline-supplementary-material-1.docx]

SUPPLEMENTARY TABLES:

S1. Immunohistochemical Profile

| Case ID | BCL6 | BCL2 | CD20 | CD10 | FOXP1 | GCET1 | MUM1 | Hans | Choi |
| --- | --- | --- | --- | --- | --- | --- | --- | --- | --- |
| 1 | 1 | 0 | 1 | 0 | 0 | 0 | 0 | GCB | GCB |
| 2 | 0 | 0 | 1 | 0 | 0 | 0 | 0 | non-GCB | non-GCB |
| 3 | 1 | 0 | 1 | 1 | 1 | 0 | 0 | GCB | GCB |
| 4 | 1 | 0 | 1 | 0 | 0 | 0 | 1 | non-GCB | GCB |
| 5 | 0 | 0 | 1 | 0 | 0 | 0 | 0 | non-GCB | non-GCB |
| 6 | 1 | 0 | 1 | 0 | 1 | 0 | 0 | GCB | non-GCB |
| 7 | 0 | 1 | 1 | 0 | 1 | 0 | 0 | non-GCB | non-GCB |
| 8 | 0 | 1 | 1 | 0 | 1 | 0 | 0 | non-GCB | non-GCB |
| 9 | 0 | 0 | 1 | 0 | 0 | 0 | 0 | non-GCB | non-GCB |
| 10 | 1 | 0 | 1 | 1 | 1 | 0 | 0 | GCB | GCB |
| 11 | 0 | 1 | 1 | 0 | 1 | 0 | 1 | non-GCB | non-GCB |
| 12 | 0 | 1 | 1 | 0 | 0 | 0 | 1 | non-GCB | non-GCB |
| 13 | 0 | 0 | 1 | 1 | 0 | 0 | 0 | GCB | GCB |
| 14 | 0 | 1 | 1 | 0 | 0 | 0 | 1 | non-GCB | non-GCB |
| 15 | 1 | 1 | 1 | 1 | 0 | 0 | 0 | GCB | GCB |
| 16 | 0 | 0 | 1 | 0 | 0 | 0 | 1 | non-GCB | non-GCB |
| 17 | 0 | 1 | 1 | 0 | 0 | 0 | 0 | non-GCB | non-GCB |
| 18 | 0 | 0 | 1 | 1 | 0 | 0 | 1 | GCB | GCB |
| 19 | 0 | 1 | 1 | 0 | 0 | 0 | 0 | non-GCB | non-GCB |
| 20 | 0 | 0 | 1 | 1 | 1 | 0 | 1 | GCB | GCB |

S2. Patients characteristics and survival

| Case ID | Sex | Age at cancer diagnosis | Site of DLBCL | 5-year survival | MYC | COO (Hans) | COO (Choi) |
| --- | --- | --- | --- | --- | --- | --- | --- |
| 1 | f | 63 | lymph node | yes | negative | GCB | GCB |
| 2 | f | 55 | lymph node/liver | no | negative | non-GCB | non-GCB |
| 3 | f | 33 | small intestine | yes | negative | GCB | GCB |
| 4 | f | 67 | lymph node | no | positive | non-GCB | GCB |
| 5 | f | 65 | lymph node | no | negative | non-GCB | non-GCB |
| 6 | f | 82 | lymph node | no | negative | GCB | non-GCB |
| 7 | f | 73 | small intestine | yes | negative | non-GCB | non-GCB |
| 8 | f | 55 | lymph node | no | negative | non-GCB | non-GCB |
| 9 | f | 73 | lymph node/tongue | no | negative | non-GCB | non-GCB |
| 10 | m | 34 | lymph node | no | negative | GCB | GCB |
| 11 | f | 50 | liver/skin | yes | negative | non-GCB | non-GCB |
| 12 | f | 53 | brain | yes | negative | non-GCB | non-GCB |
| 13 | f | 66 | lymph node | yes | positive | GCB | GCB |
| 14 | f | 60 | brain | n/a | positive | non-GCB | non-GCB |
| 15 | f | 72 | lymph node/lung | no | negative | GCB | GCB |
| 16 | f | 34 | lymph node | yes | negative | non-GCB | non-GCB |
| 17 | m | 38 | lymph node | no | positive | non-GCB | non-GCB |
| 18 | f | 43 | lung | yes | positive | GCB | GCB |
| 19 | f | 49 | small intestine | n/a | negative | non-GCB | non-GCB |
| 20 | f | 64 | lymph node | n/a | positive | GCB | GCB |
